# Supplementary material for: Discovery of Pyrrolidine-2,3-diones as Novel Inhibitors of P. aeruginosa PBP3
Source: MDPI journal article supplement (doi:10.3390/antibiotics10050529), 2021-05-04

## SUPPLEMENTARY DATA

**Table S1.**

**Table S1. High Throughput Screening validation by statistical parameters**

|           | $V_{PBP3} \pm SD$                | $V_{S2d} \pm SD$                 | S/N   | Z'factor | $CV_{PBP3} \pm SD$ | $CV_{S2d} \pm SD$ |
|-----------|----------------------------------|----------------------------------|-------|----------|--------------------|-------------------|
| HTS assay | $8.81 \pm 0.68$<br>( $n = 378$ ) | $1.29 \pm 0.19$<br>( $n = 378$ ) | 41.77 | 0.70     | $0.60 \pm 0.3$     | $0.98 \pm 0.34$   |

$V_{PBP3}$ : Mean of Positive Control (PC) was defined as the activity of  $P^A$ PBP3 in presence of D-alanine;  $V_{S2d}$ : Mean of Negative Control was defined as the S2d spontaneous hydrolysis; SD: Standard Deviations were calculated from the data obtained; S/N: Signal-to-Noise ratio indicates the difference between the PC and NC; an excellent assay should have a Z' factor between 0.5 and 1; CV: Coefficient of Variation of each signal is acceptable if < 20%.

**Table S2**

**Table S2. Pyrrolidine 2,3-dione screening hits without concentration-dependent inhibition**

| Compound | Source               | Biochemical inhibition of $P^A$ PBP3   |                                           |
|----------|----------------------|----------------------------------------|-------------------------------------------|
|          |                      | Inhibition at 100 $\mu$ M compound (%) | IC <sub>50</sub> ( $\mu$ M ) S2d-TP Assay |
| 10       | ChemDiv<br>F455-0278 | $60 \pm 21$                            | >100                                      |
| 11       | ChemDiv<br>F455-0164 | $86 \pm 7$                             | >100                                      |
| 12       | ChemDiv<br>F455-0912 | $76 \pm 32$                            | >100                                      |
| 13       | ChemDiv<br>F455-0267 | $85 \pm 7$                             | >100                                      |
| 14       | ChemDiv<br>F455-0279 | $70 \pm 19$                            | >100                                      |
| 15       | ChemDiv<br>F455-0467 | $71 \pm 12$                            | >100                                      |
| 16       | ChemDiv<br>F455-0396 | $65 \pm 11$                            | >100                                      |
| 17       | ChemDiv<br>F455-0454 | $95 \pm 4$                             | >100                                      |
| 18       | ChemDiv              | $70 \pm 21$                            | >100                                      |
| 19       | ChemDiv<br>F455-0609 | $98 \pm 4$                             | >100                                      |
| 20       | ChemDiv<br>F455-0624 | $71 \pm 13$                            | >100                                      |
| 21       | ChemDiv<br>F455-0762 | $78 \pm 31$                            | >100                                      |
| 22       | ChemDiv<br>F455-0588 | $88 \pm 14$                            | >100                                      |
| 23       | ChemDiv<br>F455-0758 | $78 \pm 9$                             | >100                                      |
| 24       | ChemDiv<br>F455-0187 | $66 \pm 7$                             | >100                                      |
| 25       | ChemDiv<br>F455-0644 | $70 \pm 18$                            | >100                                      |
| 26       | ChemDiv<br>F455-1012 | $87 \pm 32$                            | >100                                      |
| 27       | ChemDiv<br>F455-1004 | $78 \pm 30$                            | >100                                      |
| 28       | ChemDiv<br>R095-0004 | $57 \pm 57$                            | >100                                      |
| 29       | ChemDiv<br>F455-1003 | $84 \pm 27$                            | >100                                      |
| 30       | ChemDiv<br>F455-1013 | $87 \pm 22$                            | >100                                      |

## Table S3

**Table S3. Minimal Inhibitory Concentrations of pyrrolidine-2,3-dione against wild-type strains**

|           | MIC (μM) against different strains |       |                |                      |                        |                      |                    |                  |
|-----------|------------------------------------|-------|----------------|----------------------|------------------------|----------------------|--------------------|------------------|
|           | <i>P. aeruginosa</i> <sup>a</sup>  |       | <i>E. coli</i> | <i>K. pneumoniae</i> | <i>A. baumannii</i>    | <i>S. pneumoniae</i> | <i>B. subtilis</i> | <i>S. aureus</i> |
|           | PAO1                               | K2896 | Neumann        | clinical isolate     | ATCC15308 <sup>b</sup> |                      | 168                | 133              |
| <b>1</b>  | >100                               | 12.5  | >100           | >100                 | >100                   | 25                   | >100               | >100             |
| <b>32</b> | >100                               | >100  | >100           | >100                 | >100                   | >100                 | 100                | >100             |
| <b>33</b> | >100                               | >100  | >100           | >100                 | >100                   | 50                   | >100               | >100             |
| <b>34</b> | 3.13                               | 12.5  | >100           | >100                 | >100                   | 12.5                 | 25                 | 6.25             |
| <b>35</b> | 3.13                               | 12.5  | >100           | >100                 | >100                   | 6.25                 | 6.25               | 3.13             |
| <b>36</b> | >100                               | 100   | >100           | >100                 | >100                   | >100                 | >100               | >100             |
| <b>37</b> | 6.25                               | 12.5  | >100           | >100                 | >100                   | 50                   | 3.13               | 6.25             |
| <b>38</b> | >100                               | >100  | >100           | >100                 | >100                   | 25                   | >100               | >100             |
| <b>39</b> | 6.25                               | 25    | >100           | >100                 | >100                   | 25                   | >100               | 25               |
| <b>40</b> | 25                                 | >100  | >100           | >100                 | >100                   | 12.5                 | >100               | >100             |
| <b>41</b> | >100                               | 25    | >100           | >100                 | >100                   | 50                   | >100               | >100             |
| <b>42</b> | >100                               | >100  | >100           | >100                 | >100                   | >100                 | >100               | >100             |
| <b>43</b> | >100                               | >100  | >100           | 6.25–3.13            | >100                   | >100                 | >100               | >100             |
| <b>44</b> | >100                               | >100  | >100           | >100                 | >100                   | >100                 | >100               | >100             |
| <b>45</b> | >100                               | >100  | >100           | >100                 | >100                   | 25                   | >100               | 6.25             |

<sup>a</sup> 4 μg/mL PMBN, <sup>b</sup> 10 μg/mL PMBN

## TABLE S4

**Table S4. MIC of control compounds against selected strains.**

| Strain Name                           | PMBN (μg/ mL) | MIC (μM) against selected bacteria <sup>1</sup> |            |
|---------------------------------------|---------------|-------------------------------------------------|------------|
|                                       |               | Aztreonam                                       | Tygecyclin |
| <i>P. aeruginosa</i> PAO1             | 4             | 0.58                                            | 0.4        |
|                                       | 0             | >1.2                                            | >4         |
| <i>P. aeruginosa</i> K2896            | 4             | 0.29                                            | 0.2        |
|                                       | 0             | 0.575                                           | 0.8        |
| <i>E. coli</i> Neumann                | 0             | 0.287                                           | 0.4        |
| <i>A. baumannii</i> ATCC15308         | 50            | 0.58                                            | 0.4        |
|                                       | 0             | >1.2                                            | 0.9        |
| <i>K. pneumoniae</i> clinical isolate | 50            | 0.071                                           | 0.4        |
|                                       | 0             | 0.143                                           | 0.9        |
| <i>S. pneumoniae</i>                  | 0             | >1.2                                            | 0.1        |
| <i>B. subtilis</i> 168                | 0             | >1.2                                            | 0.2        |
| <i>S. aureus</i> 133                  | 0             | >1.2                                            | 0.2        |

<sup>1</sup> Values represent the median of at least three independent experiments

**Table S5**

**Table S5. Detailed cytotoxicity of pyrrolidine-2,3-dione against four eukaryotic cell lines**

| Compound             | Cytotoxicity effect (μM)  |                             |                           |                    |
|----------------------|---------------------------|-----------------------------|---------------------------|--------------------|
|                      | Epithelial liver<br>HepG2 | Epithelial kidney<br>NRK52E | T-lymphoblast<br>CCRF-CEM | T-lymphocyte<br>H9 |
| <b>1</b>             | >100                      | >100                        | >100                      | >100               |
| <b>32</b>            | >100                      | 98 ± 5                      | 94 ± 6                    | >100               |
| <b>33</b>            | >100                      | 84 ± 5                      | 58 ± 6                    | >100               |
| <b>34</b>            | >100                      | >100                        | >100                      | >100               |
| <b>35</b>            | >100                      | 53 ± 5                      | >100                      | 96 ± 7             |
| <b>36</b>            | 1 ± 2                     | 58 ± 3                      | 9 ± 4                     | 48 ± 2             |
| <b>37</b>            | 20 ± 4                    | 9 ± 12                      | 8 ± 6                     | 19 ± 6             |
| <b>38</b>            | >100                      | >100                        | >100                      | >100               |
| <b>39</b>            | >100                      | >100                        | >100                      | >100               |
| <b>40</b>            | >100                      | >100                        | 93 ± 4                    | >100               |
| <b>41</b>            | >100                      | >100                        | >100                      | >100               |
| <b>42</b>            | >100                      | >100                        | >100                      | >100               |
| <b>43</b>            | >100                      | 73 ± 9.2                    | >100                      | >100               |
| <b>44</b>            | >100                      | 52 ± 3                      | >100                      | >100               |
| <b>45</b>            | 23 ± 8                    | 23 ± 11                     | 52 ± 8                    | 32 ± 10            |
| <b>Cycloheximide</b> | 1.34 ± 0.7                | 0.20 ± 0.2                  | 0.66 ± 0.5                | 0.53 ± 0.3         |

**Table S6**

**Table S6. Eukaryotic cell and culture media**

| Cell line                                                 | Media composition                                                                                                                 |
|-----------------------------------------------------------|-----------------------------------------------------------------------------------------------------------------------------------|
| CCRF-CEM ATCC® CCL-119™                                   | <b>RPMI 1640 PAN</b>                                                                                                              |
|                                                           | L-Glutamine<br>2,0 g/L NaHCO <sub>3</sub> , 10% FCS, 1% L-Glutamine, 1% Pen/Strep                                                 |
| Huh 7<br>(Prof. Bartenschlager,<br>Heidelberg University) | <b>DMEM PAN</b>                                                                                                                   |
|                                                           | + 4,5 g/L Glucose, L-Glutamine, Pyruvate, 3,7 g/L NaHCO <sub>3</sub> , 10%<br>FCS, 1% L-Glutamine, 1% Pen/Strep, 1% NEAA          |
| HepG2 ATCC® HB-8065™                                      | <b>MEM PAN</b>                                                                                                                    |
|                                                           | + 4,5 g/L Glucose, L-Glutamine, Pyruvate, 3,7 g/L NaHCO <sub>3</sub> , 10%<br>FCS, 1% L-Glutamine, 1% Pen/Strep, 1% NEAA          |
| NRK52E ATCC® CRL-1571™                                    | <b>DMEM PAN</b>                                                                                                                   |
|                                                           | + 4,5 g/L Glucose, L-Glutamine, Pyruvate, 3,7 g/L NaHCO <sub>3</sub> , 10 %<br>FCS, 1% Na-Pyruvate, 1% L-Glutamine, 1 % Pen/Strep |

**Figure S1: NMR Spectra of representative pyrroldine-2,3-diones:**

**Compound 1.**

pdm3262.fid

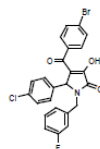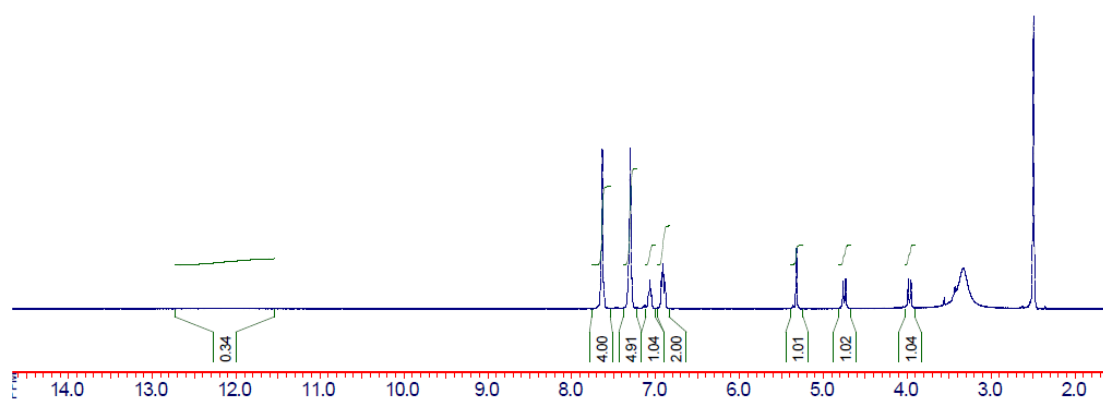

|                        |               |                  |           |                            |
|------------------------|---------------|------------------|-----------|----------------------------|
| File name: pdm3262.fid | Operator:     | SF: 499.8279 MHz | NSC: 0    | PW: 9.80 usec, RG: 12      |
| Date: 16-May-2019      | Solvent: dms0 | SW: 8993 Hz      | TE: 323 K | AQ: 1.78 sec, RD: 0.00 sec |

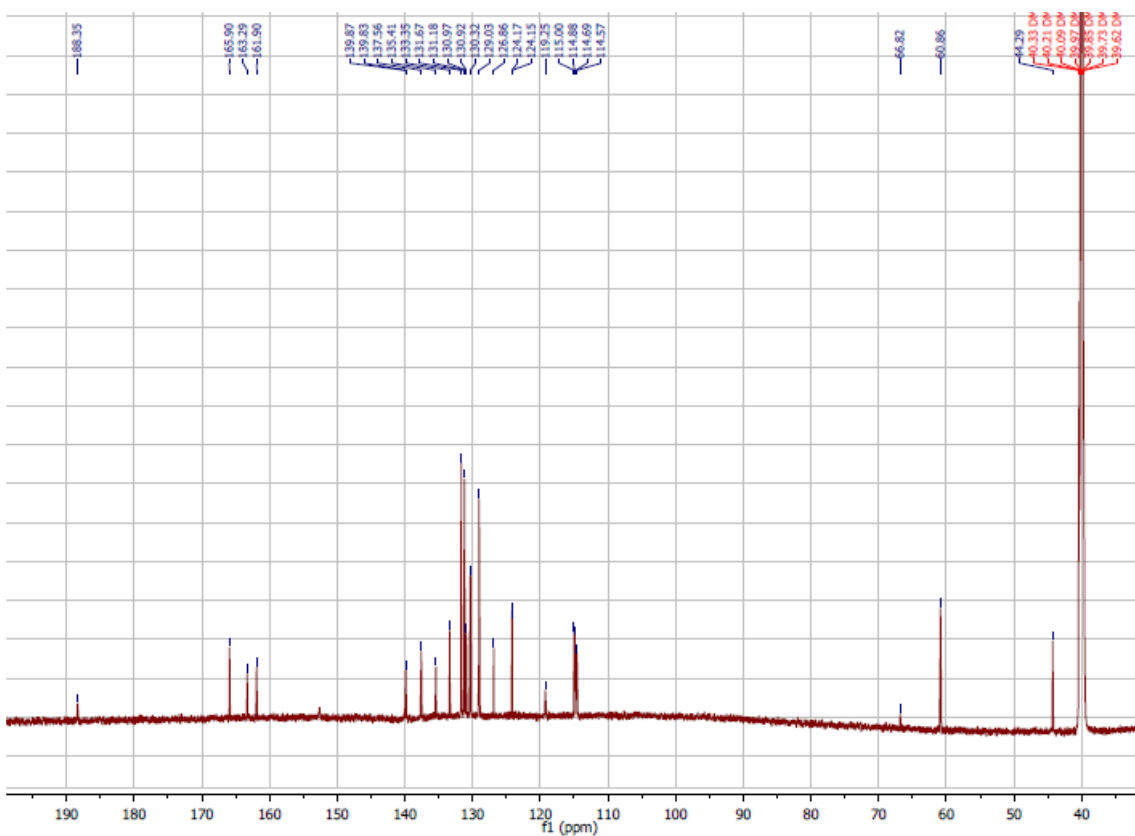

## Compound 32.

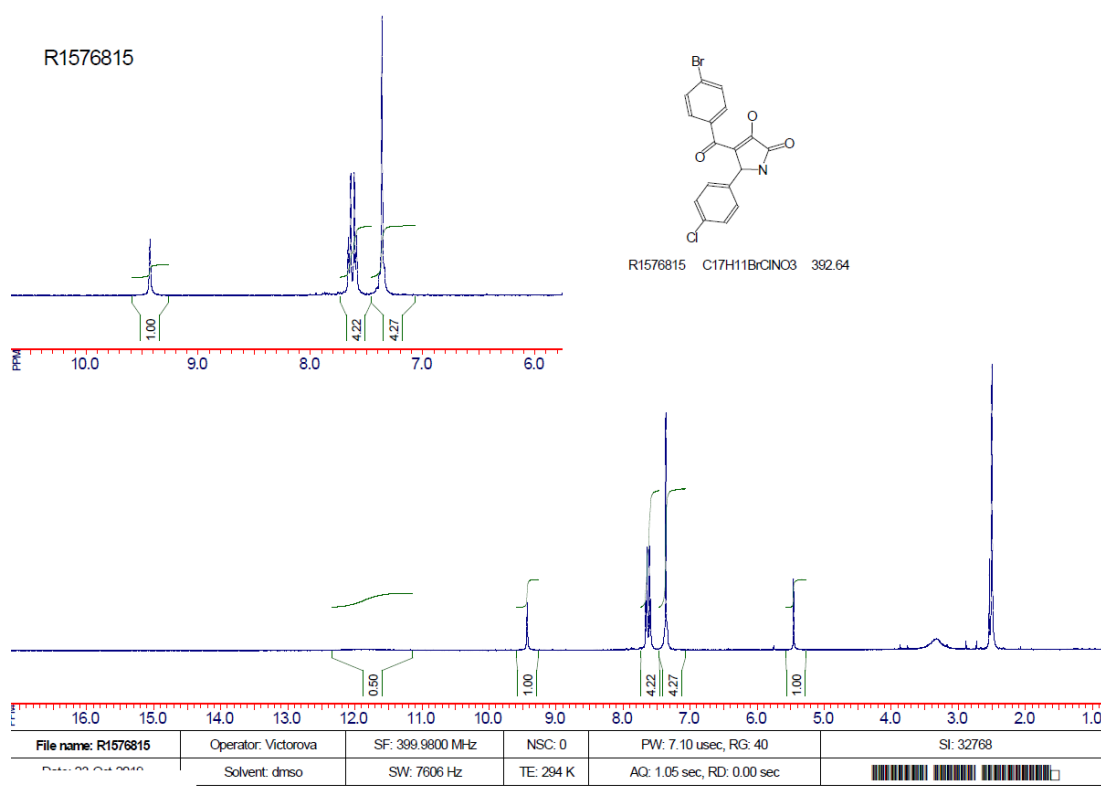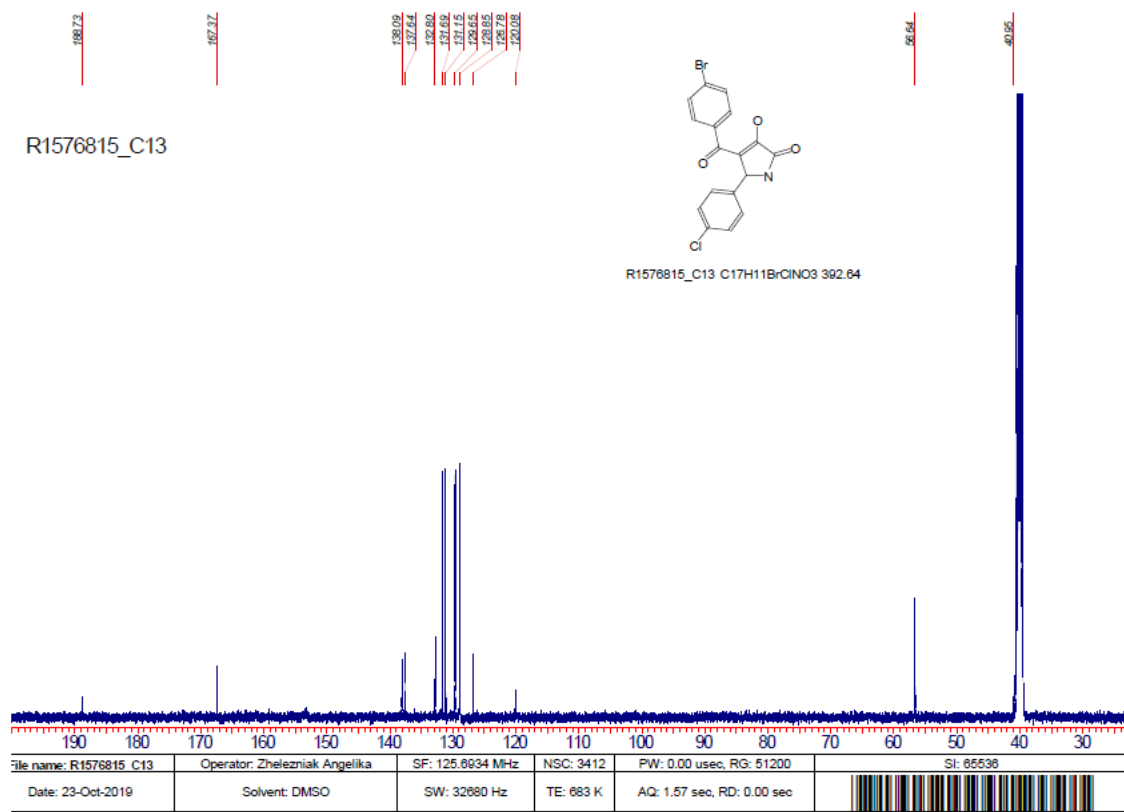

## Compound 33.

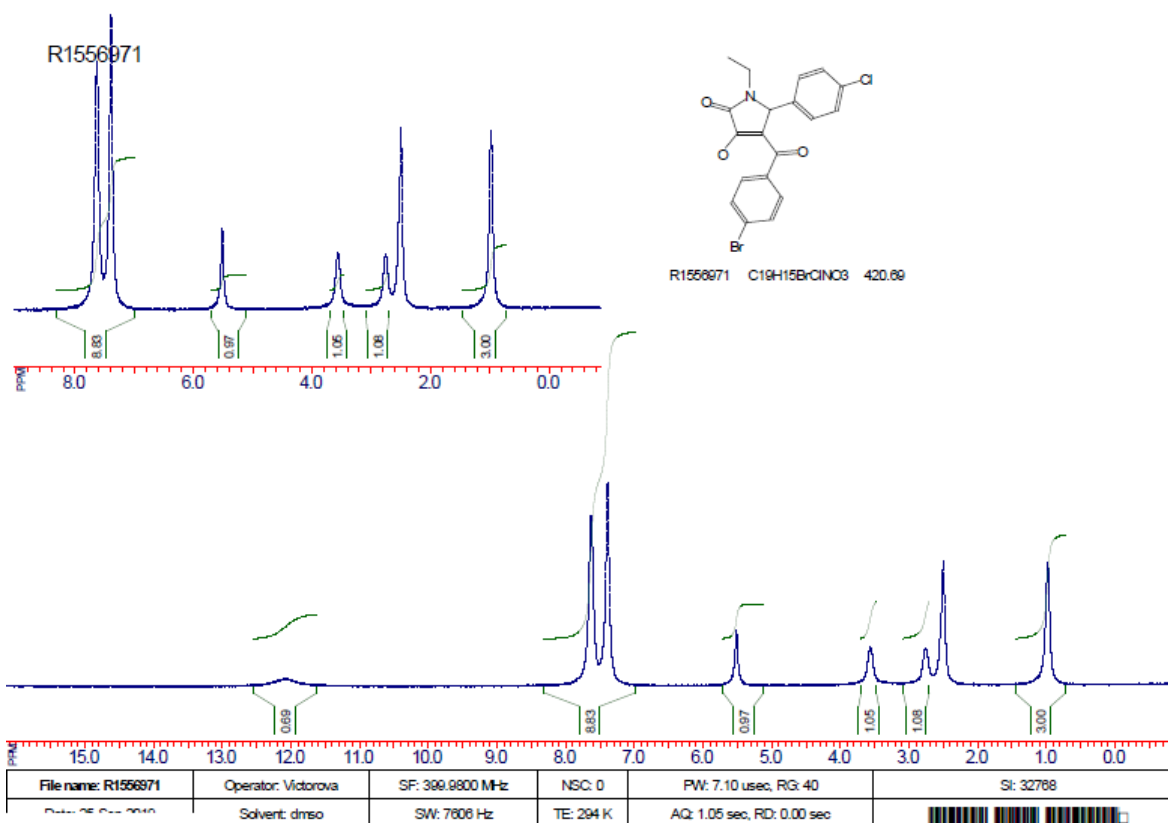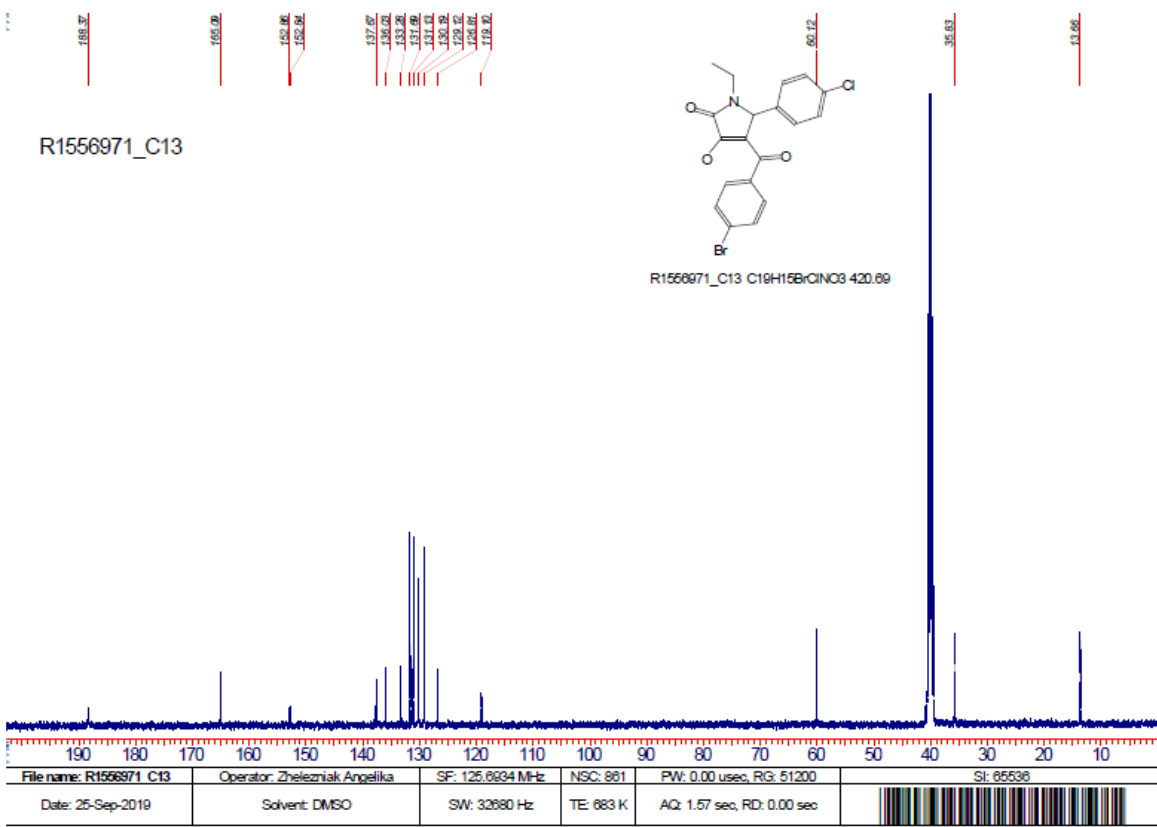

Compound 34

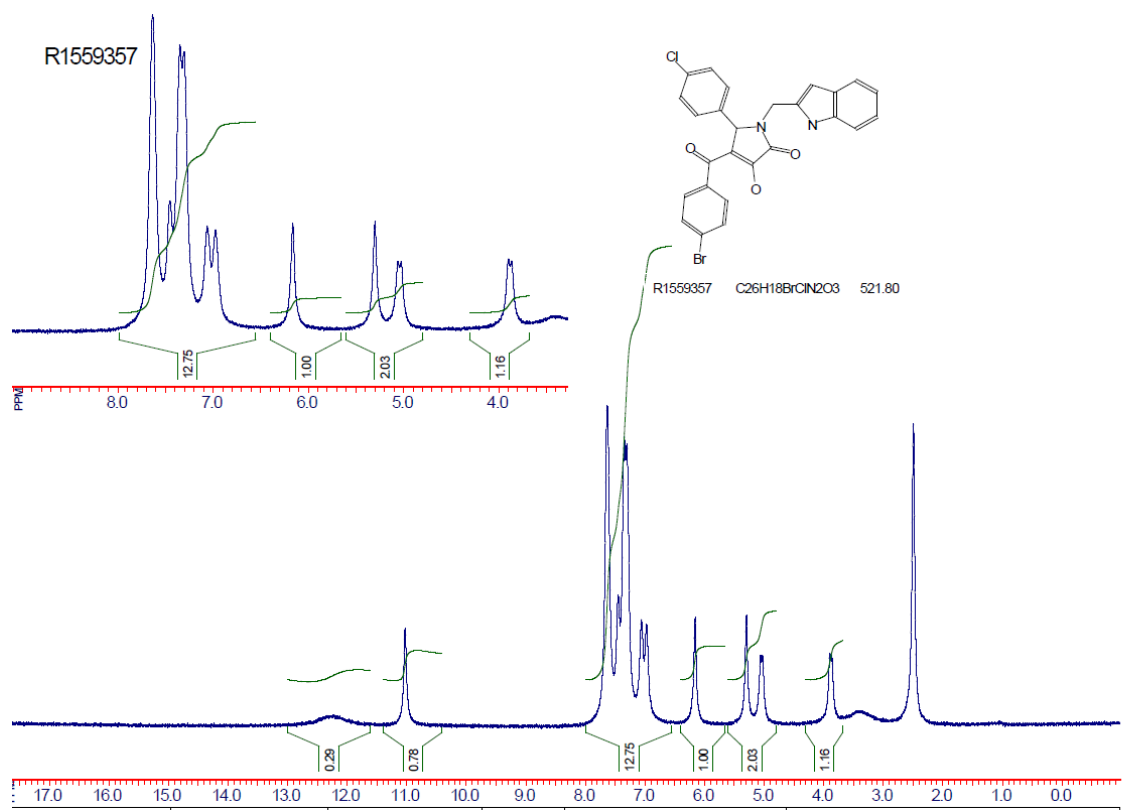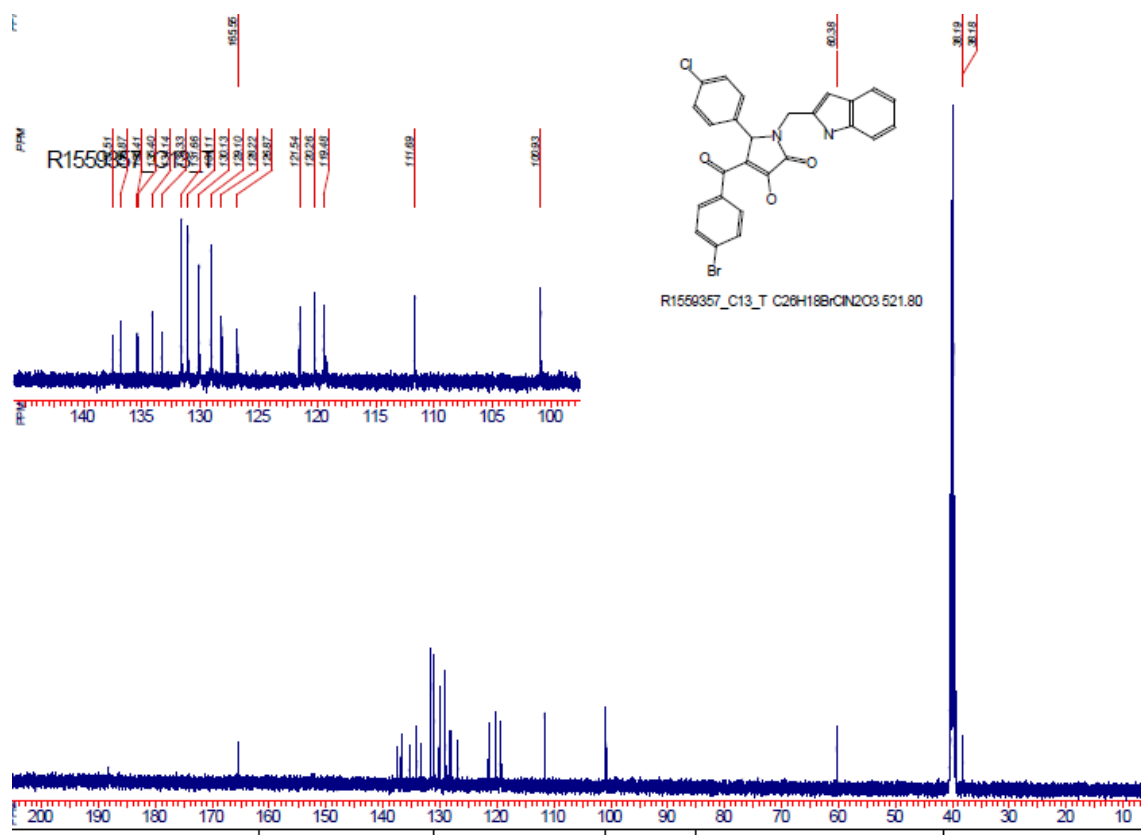

Compound 35.

tr3963.fid

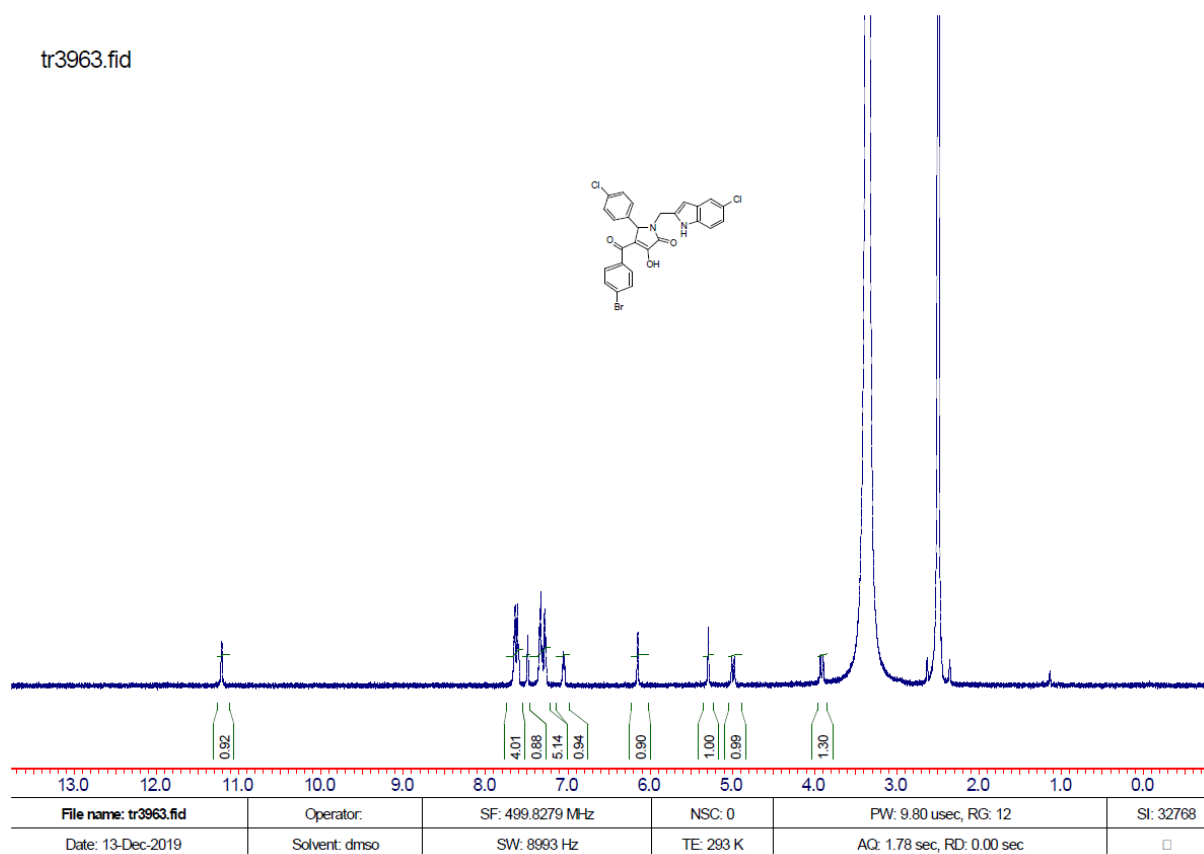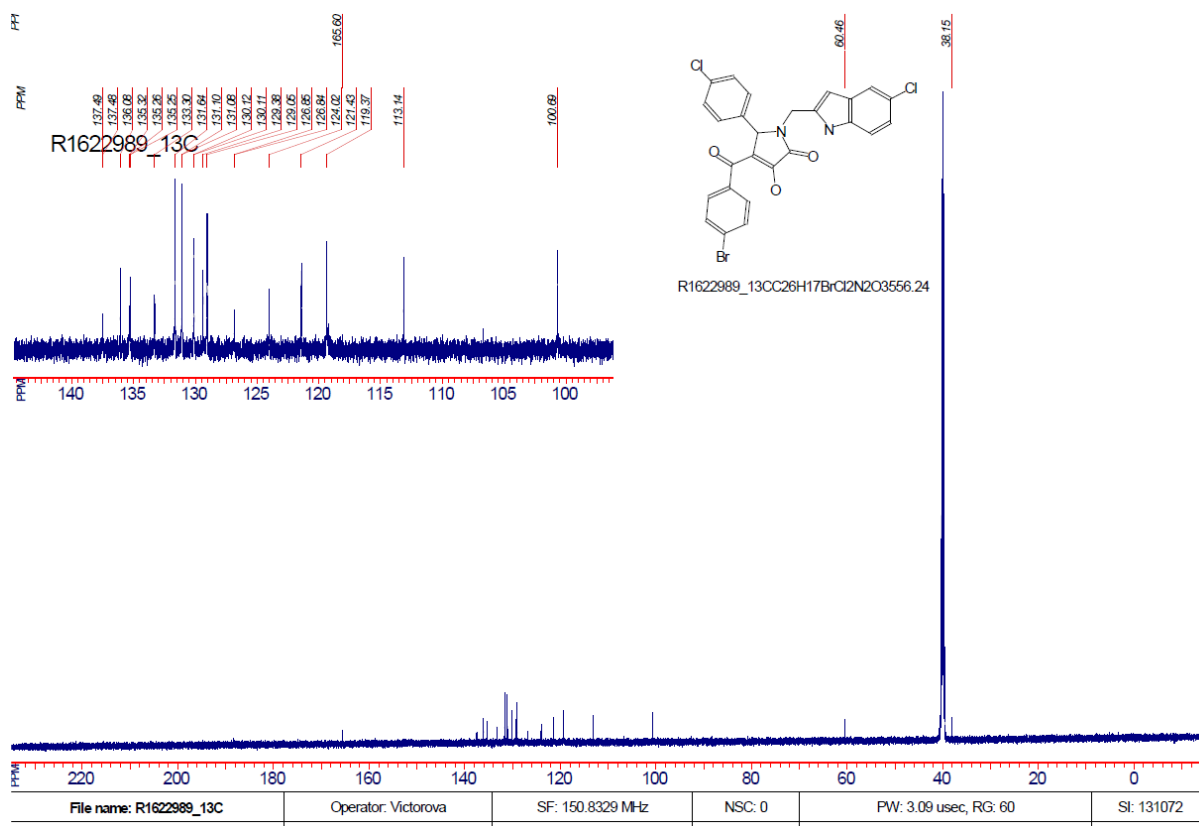

Compound 36.



<sup>1</sup>H NMR spectrum of KK05-06:

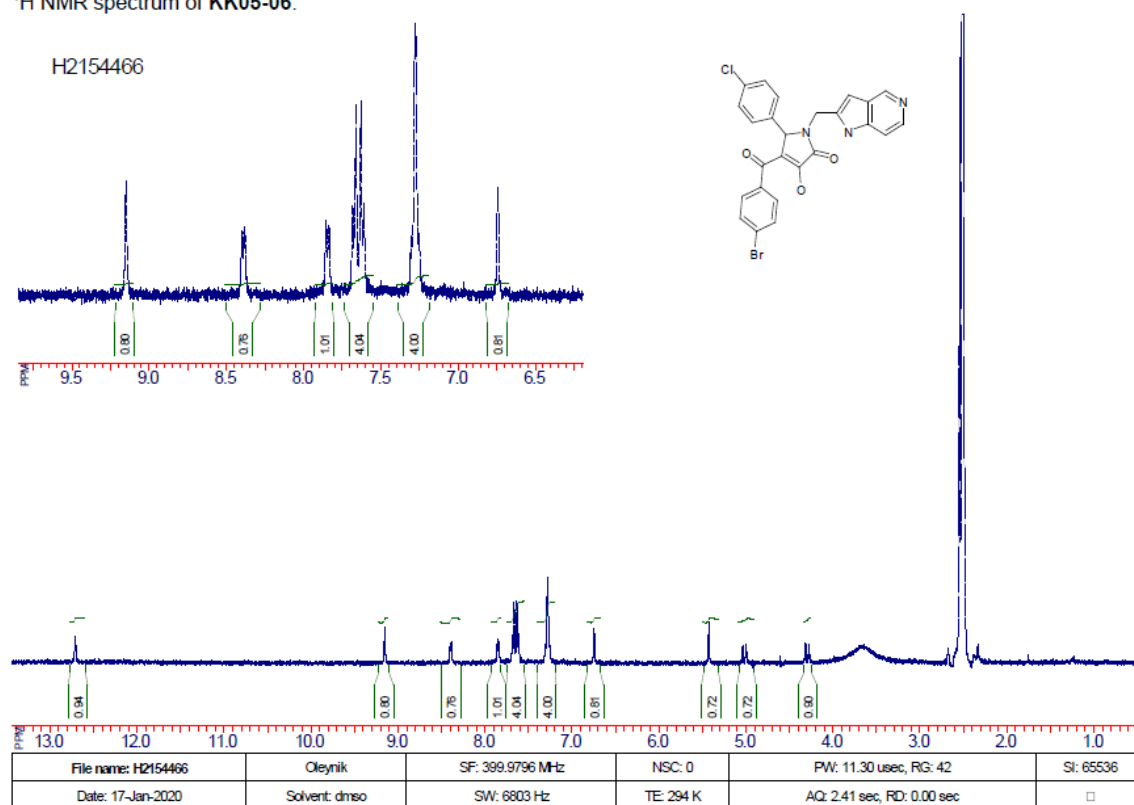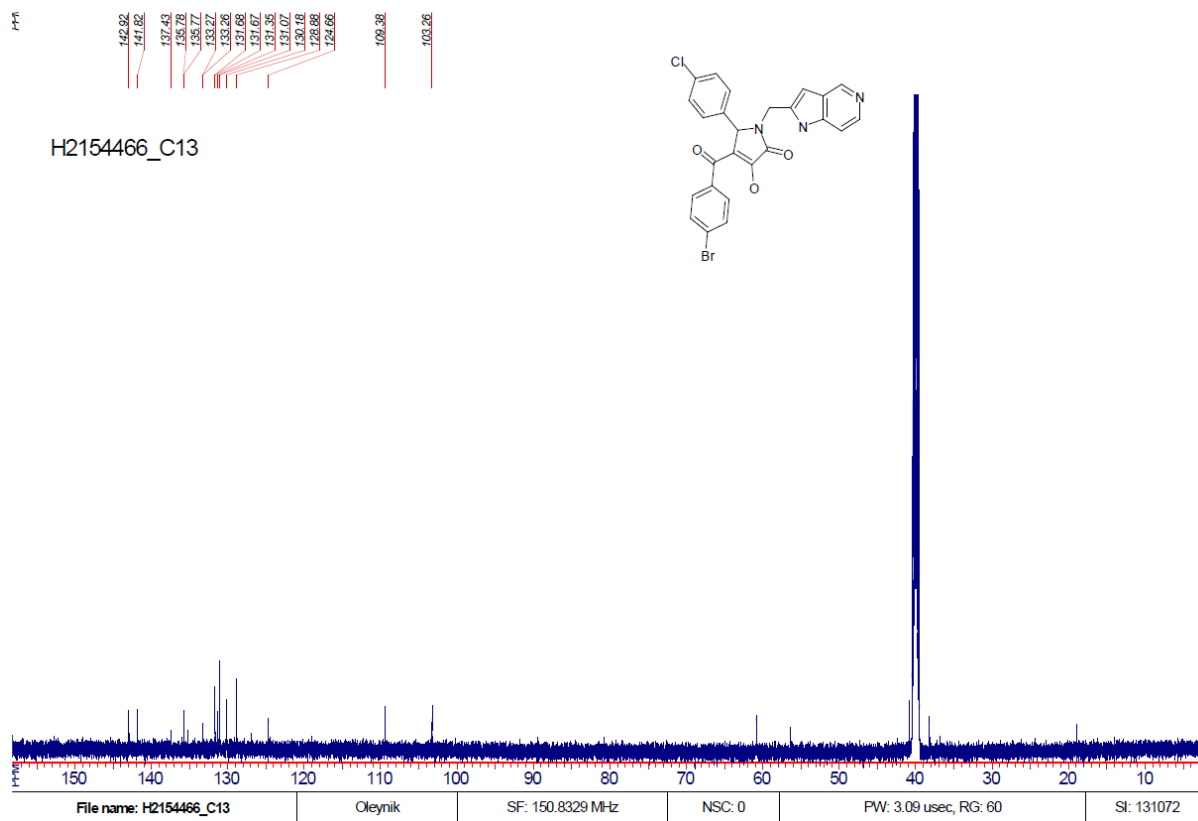

Compound 37.

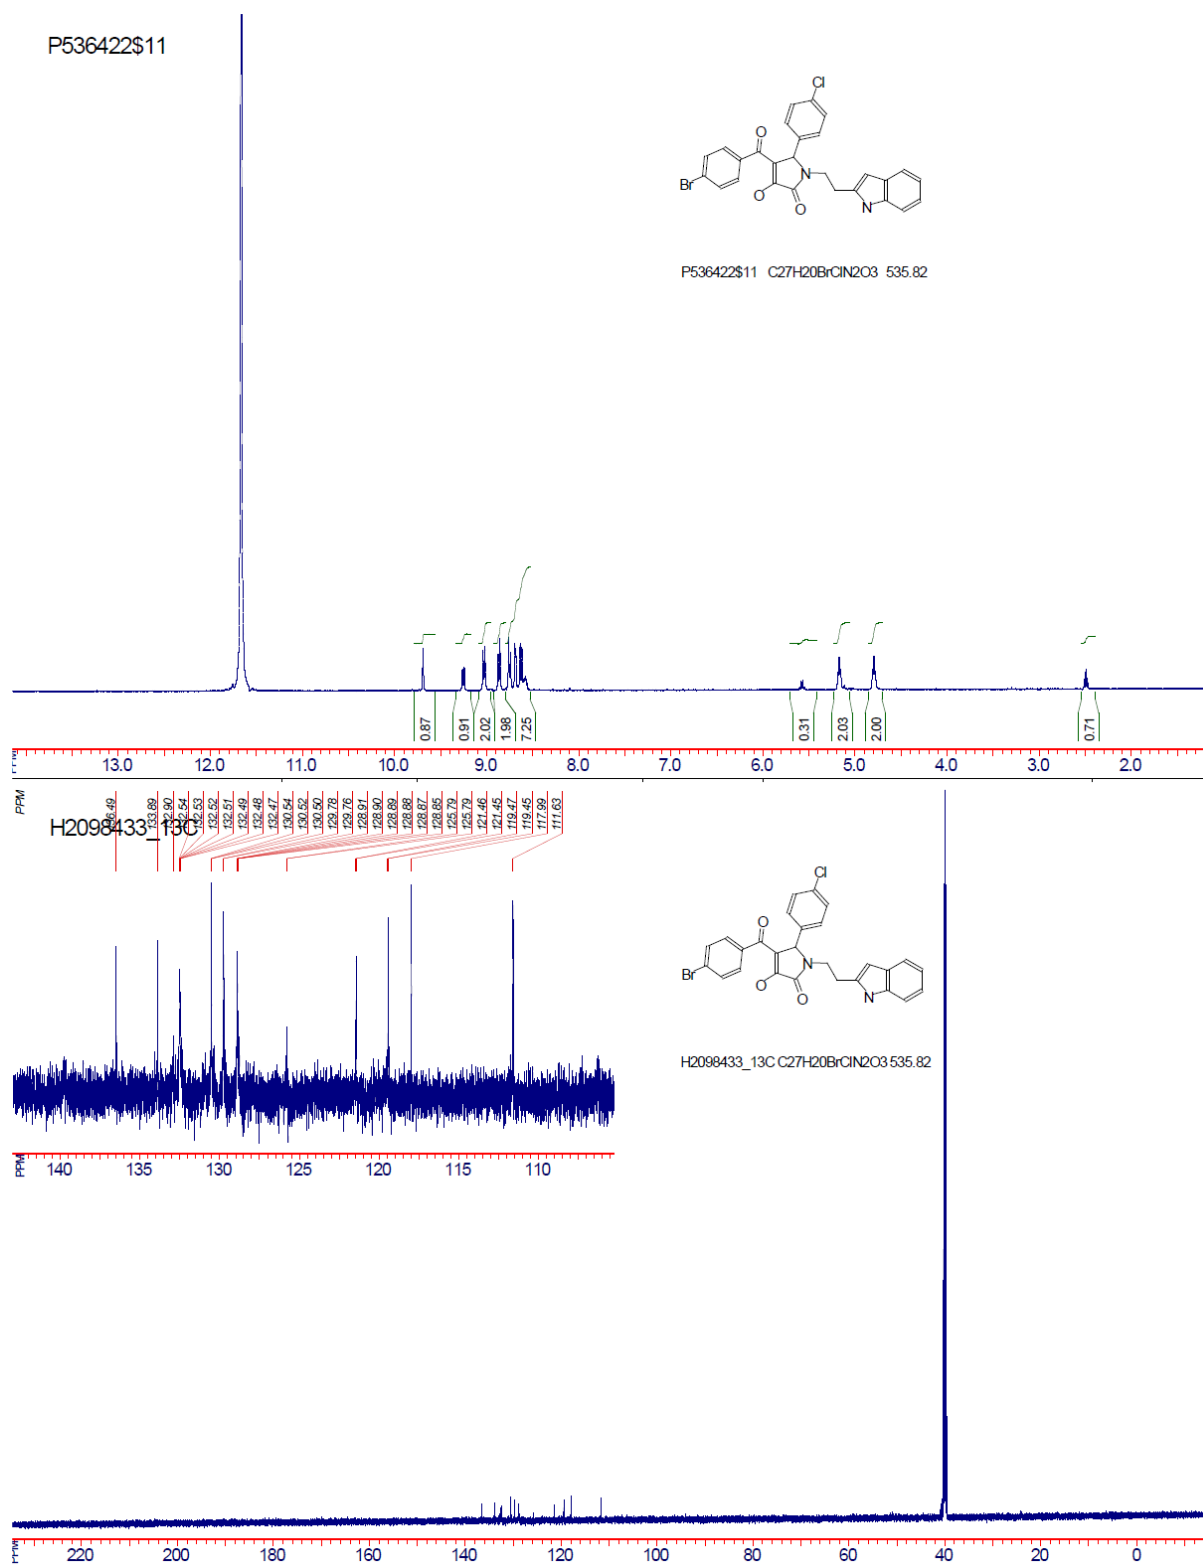

Compound 38.

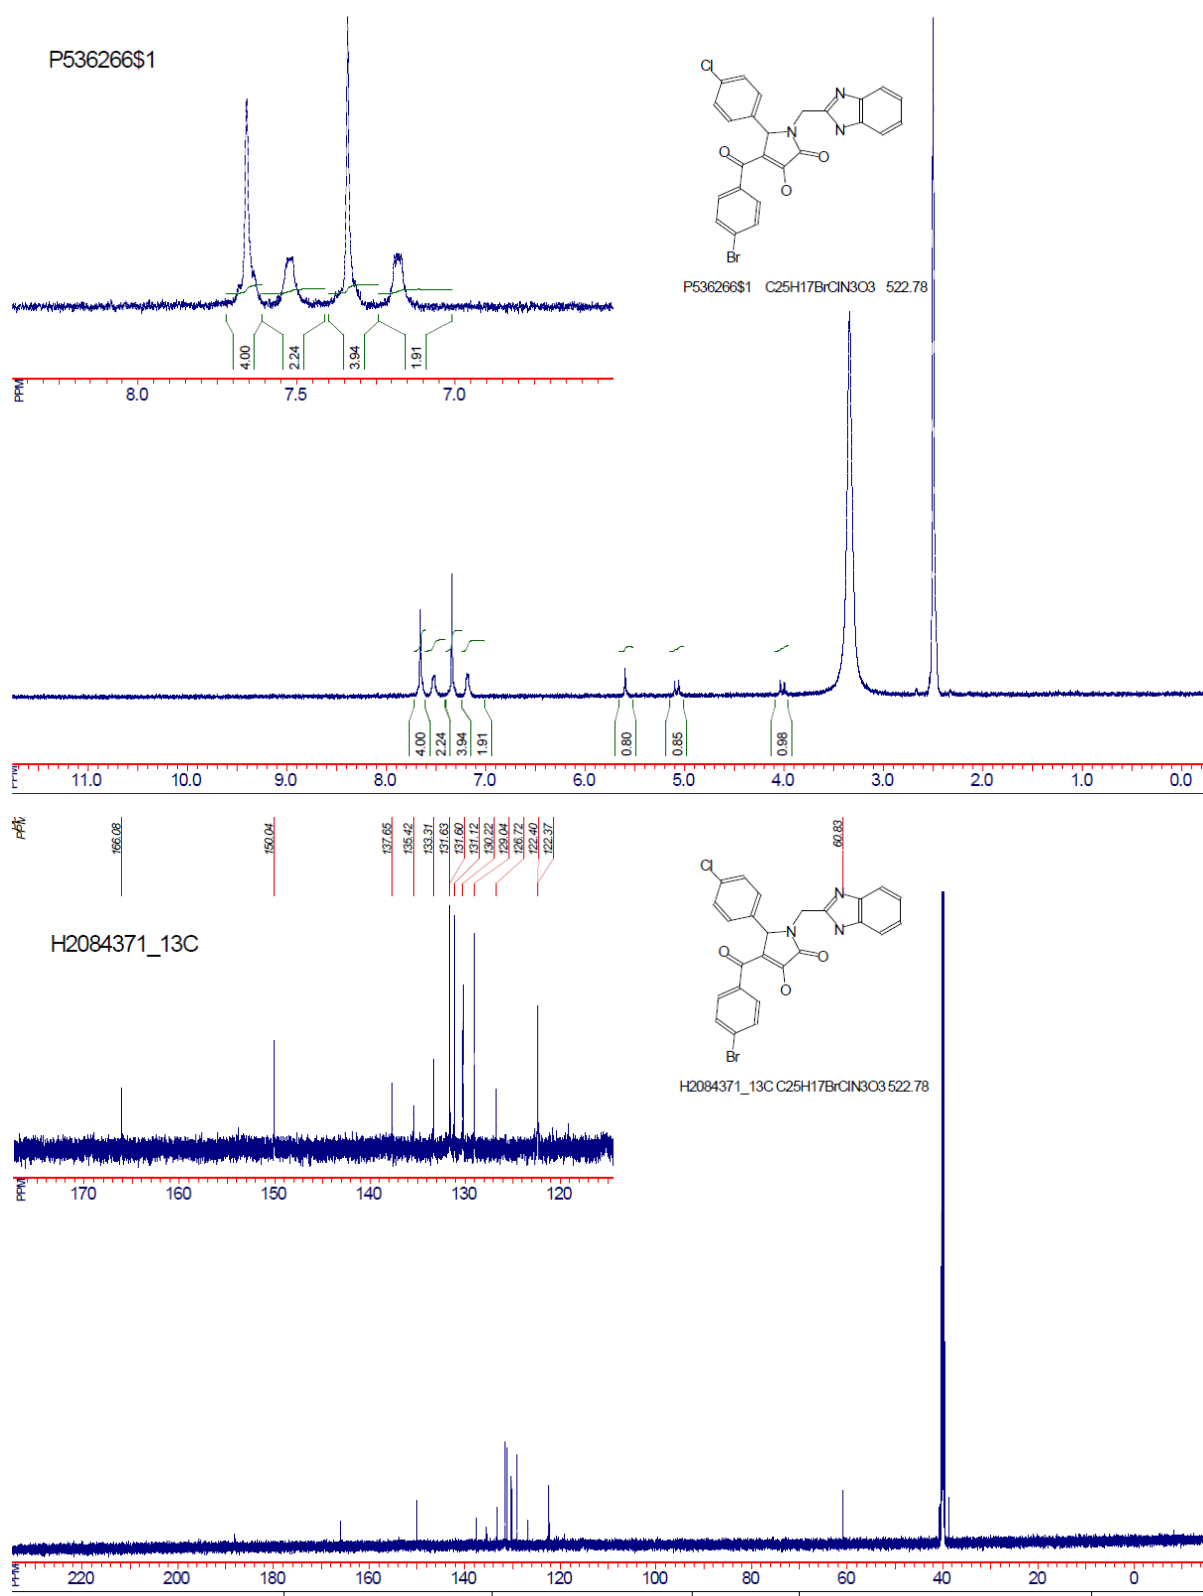

Compound 39.

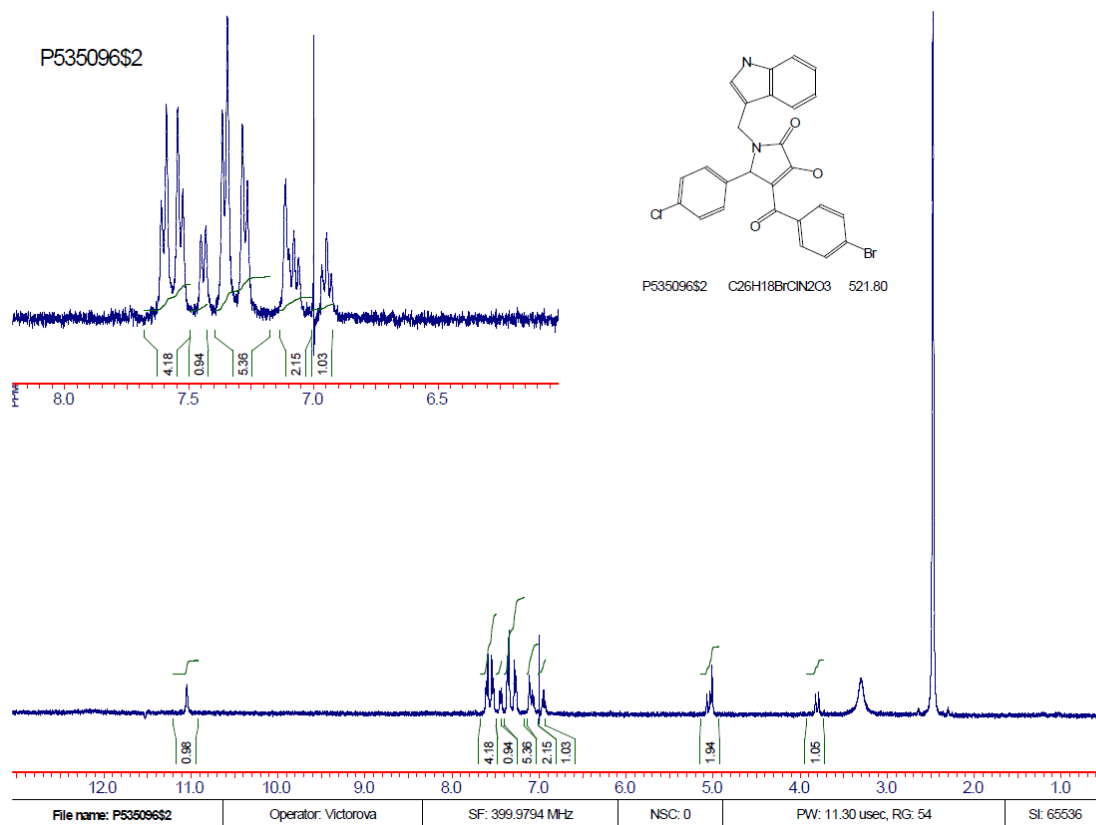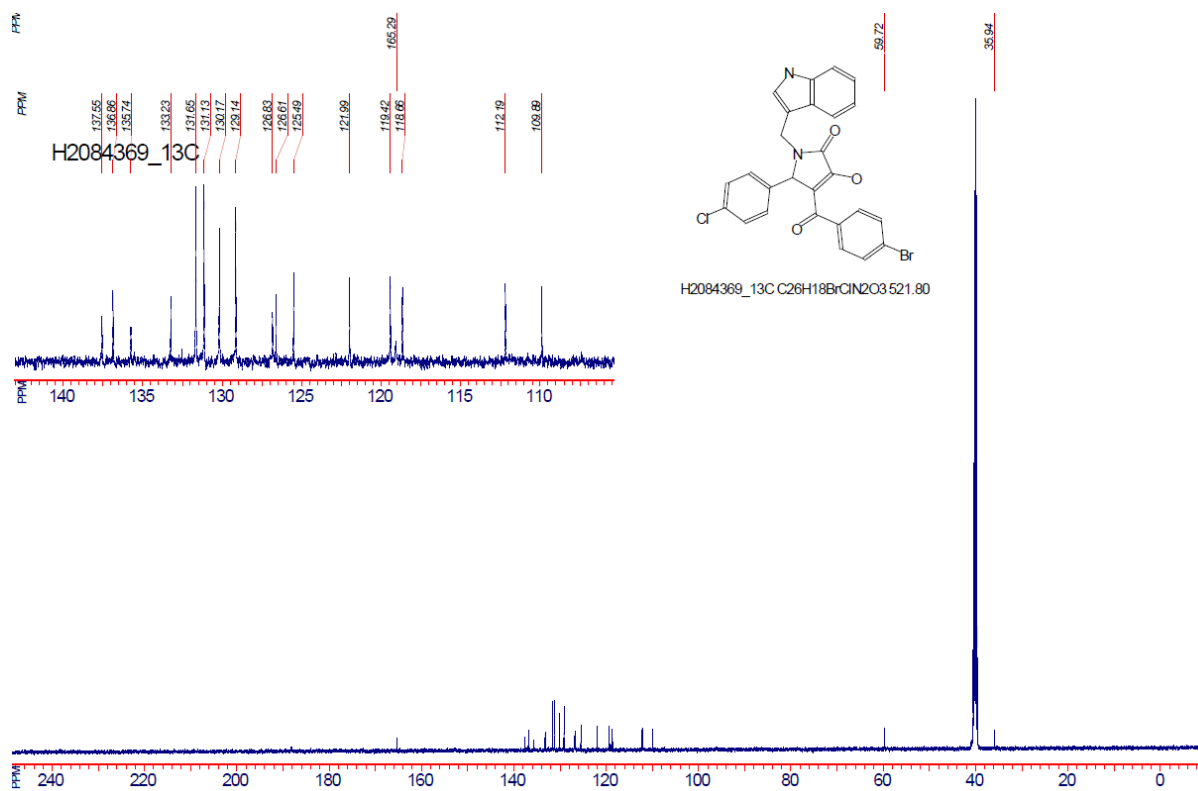

Compound 40.

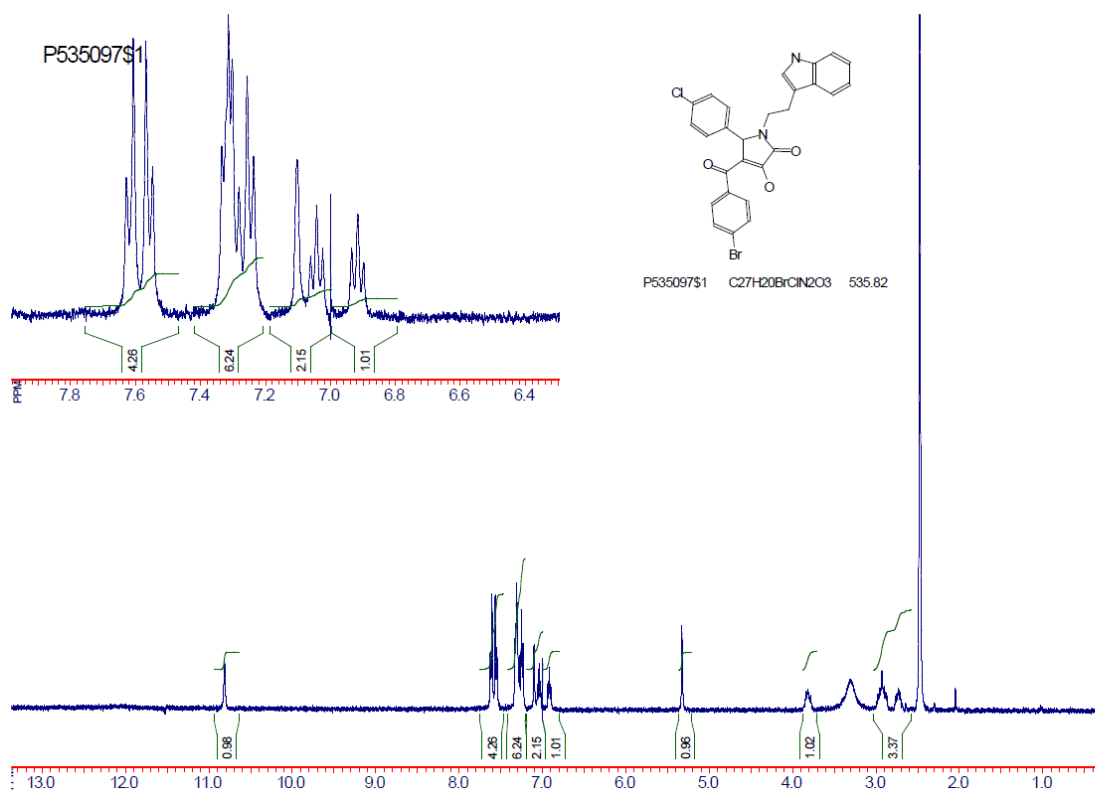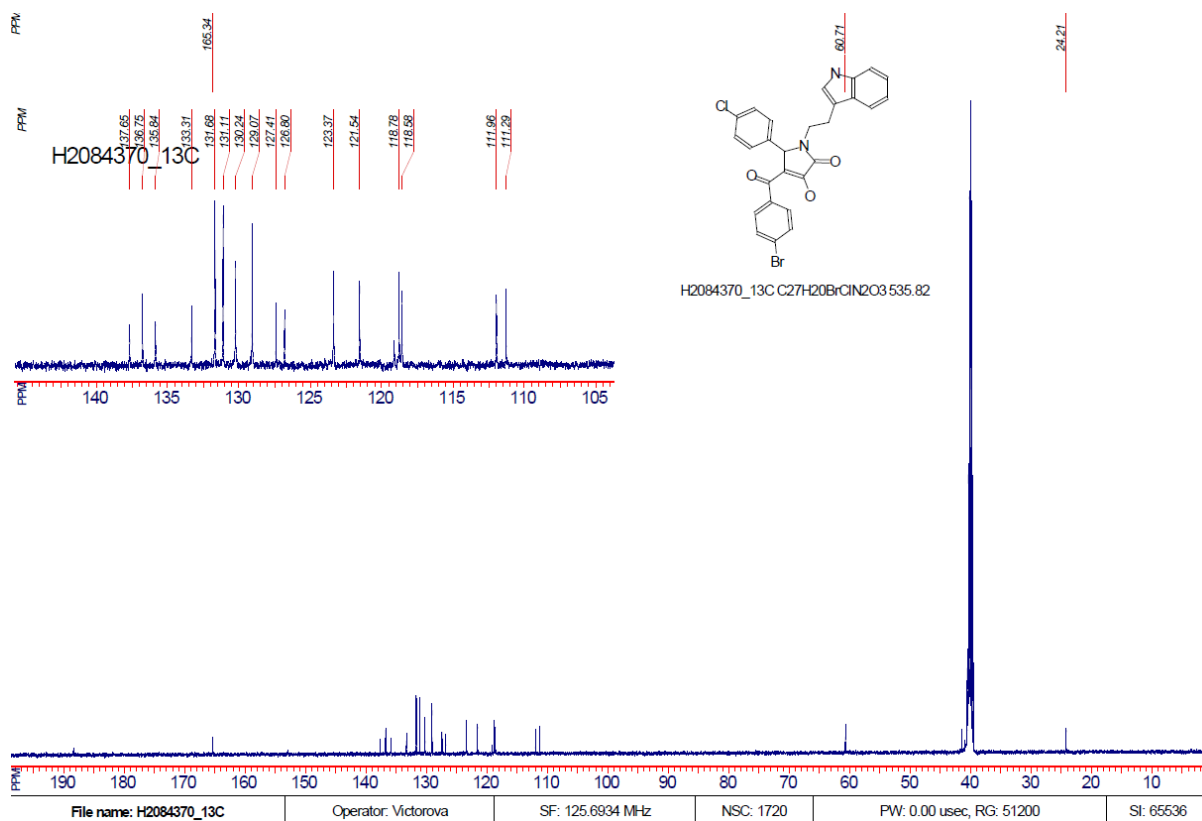

Compound 41.

R1556042\_T

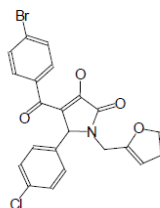

R1556042\_T C22H15BrClNO4 472.72

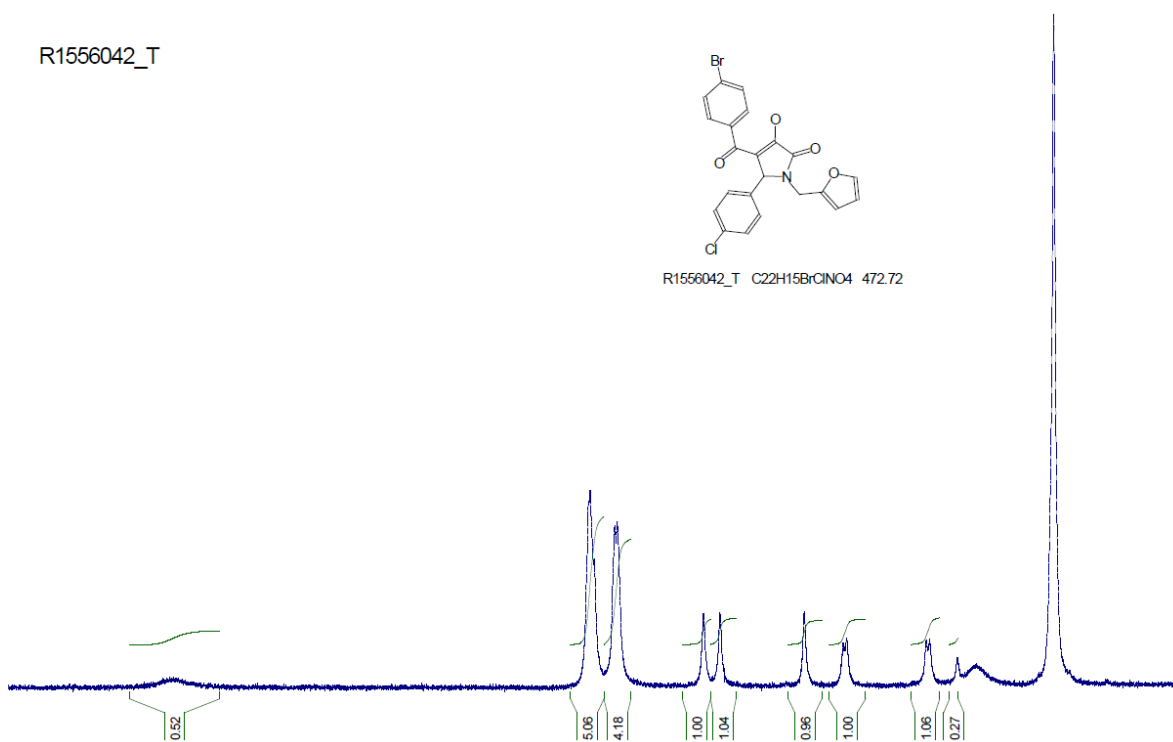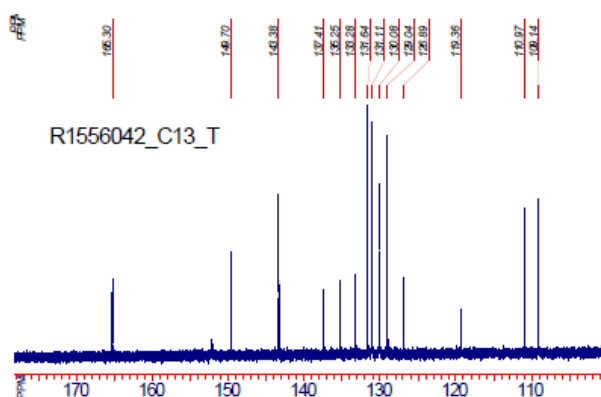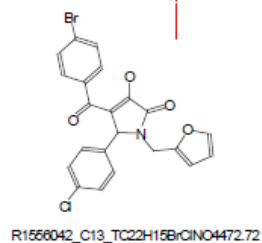

R1556042\_C13\_TC22H15BrClNO4472.72

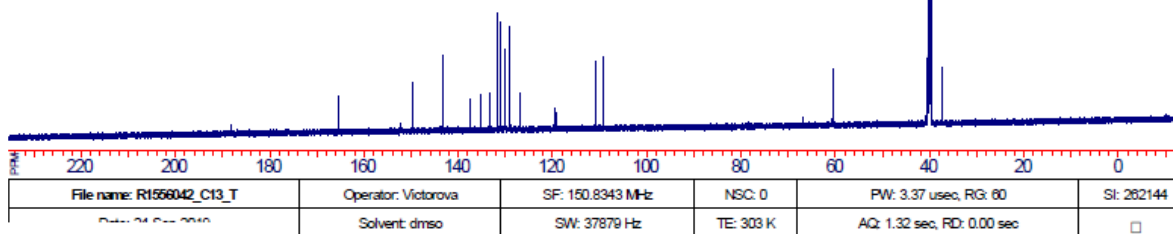

Compound 42.

pdm5190.fid

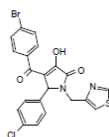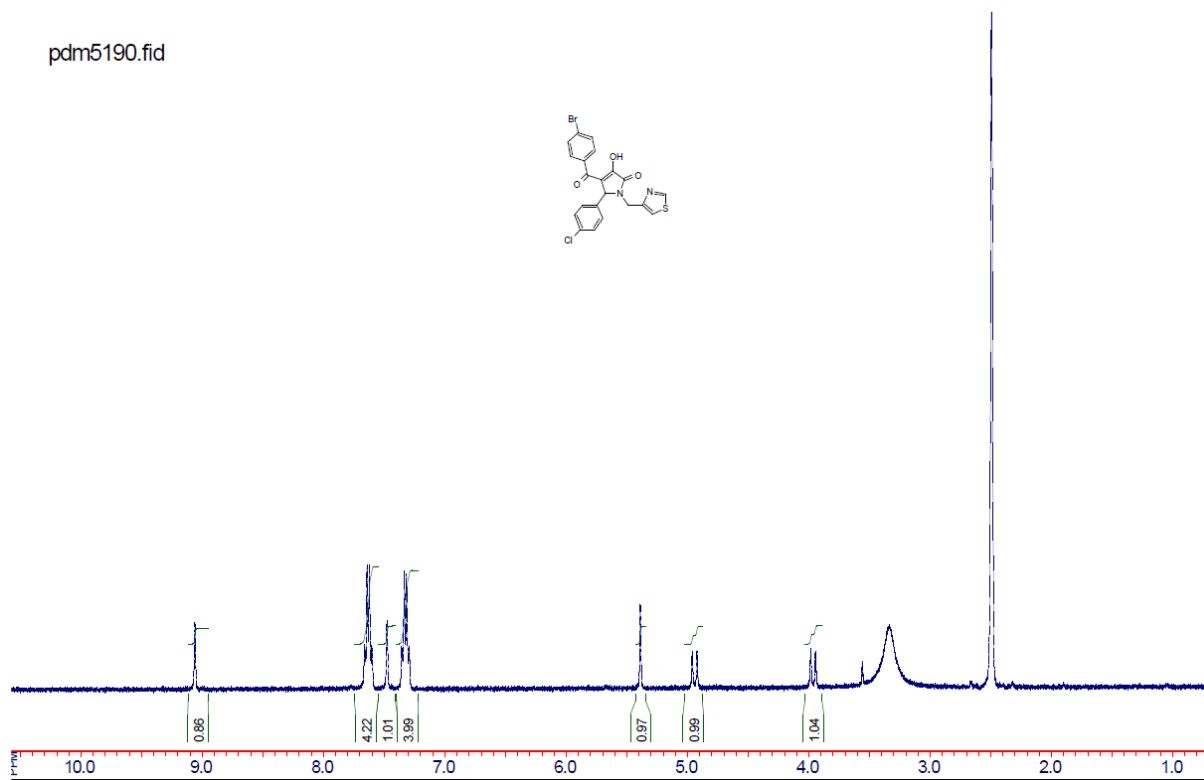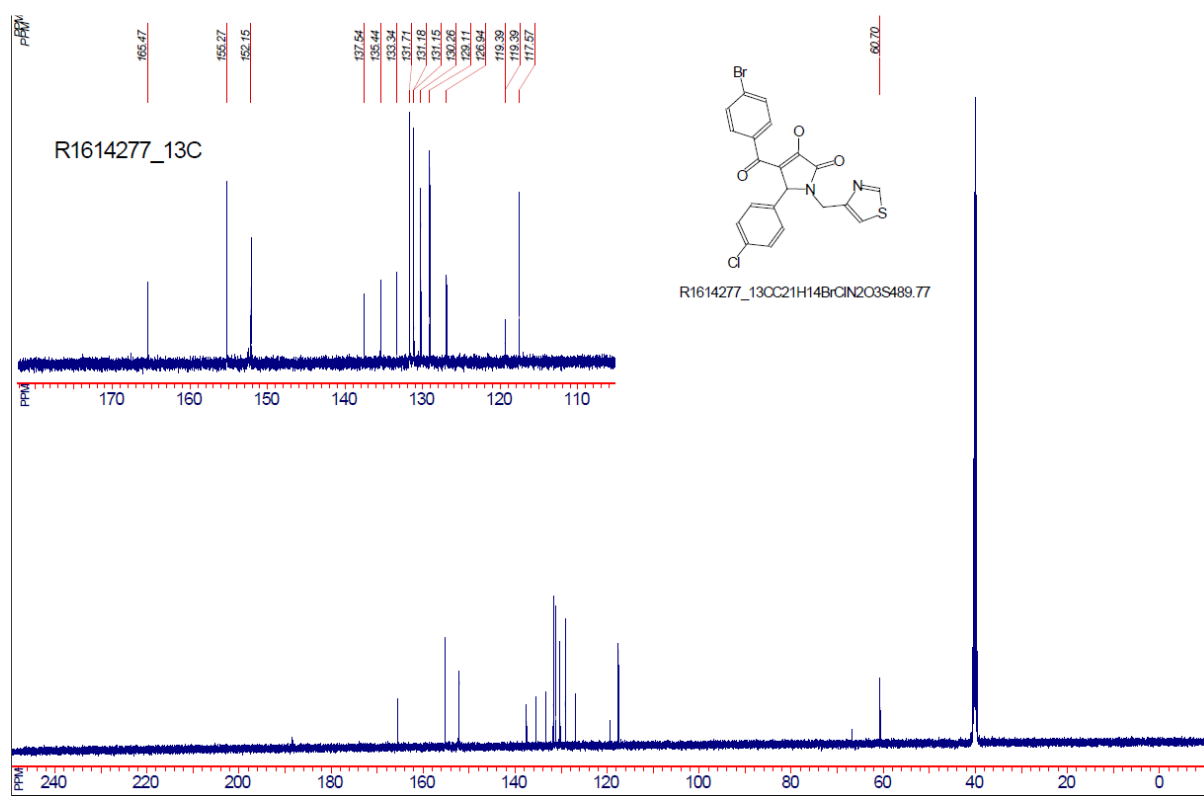

Compound 43.

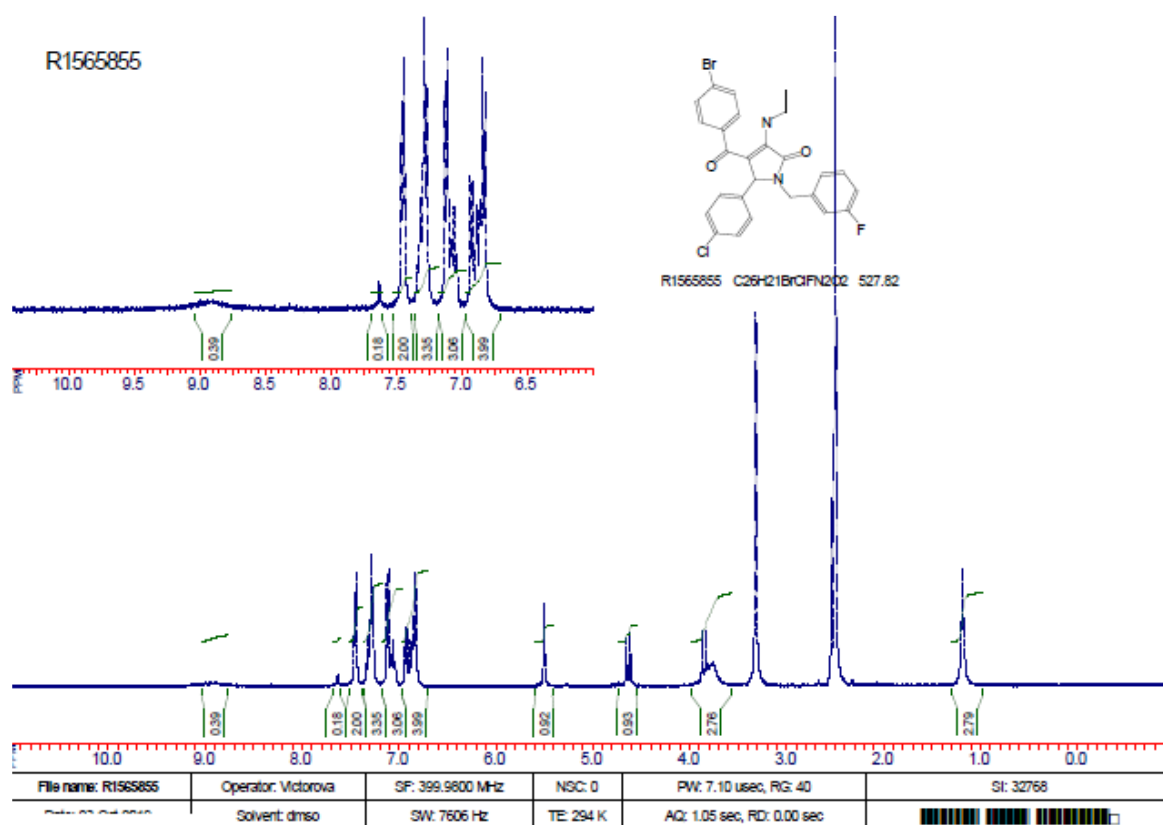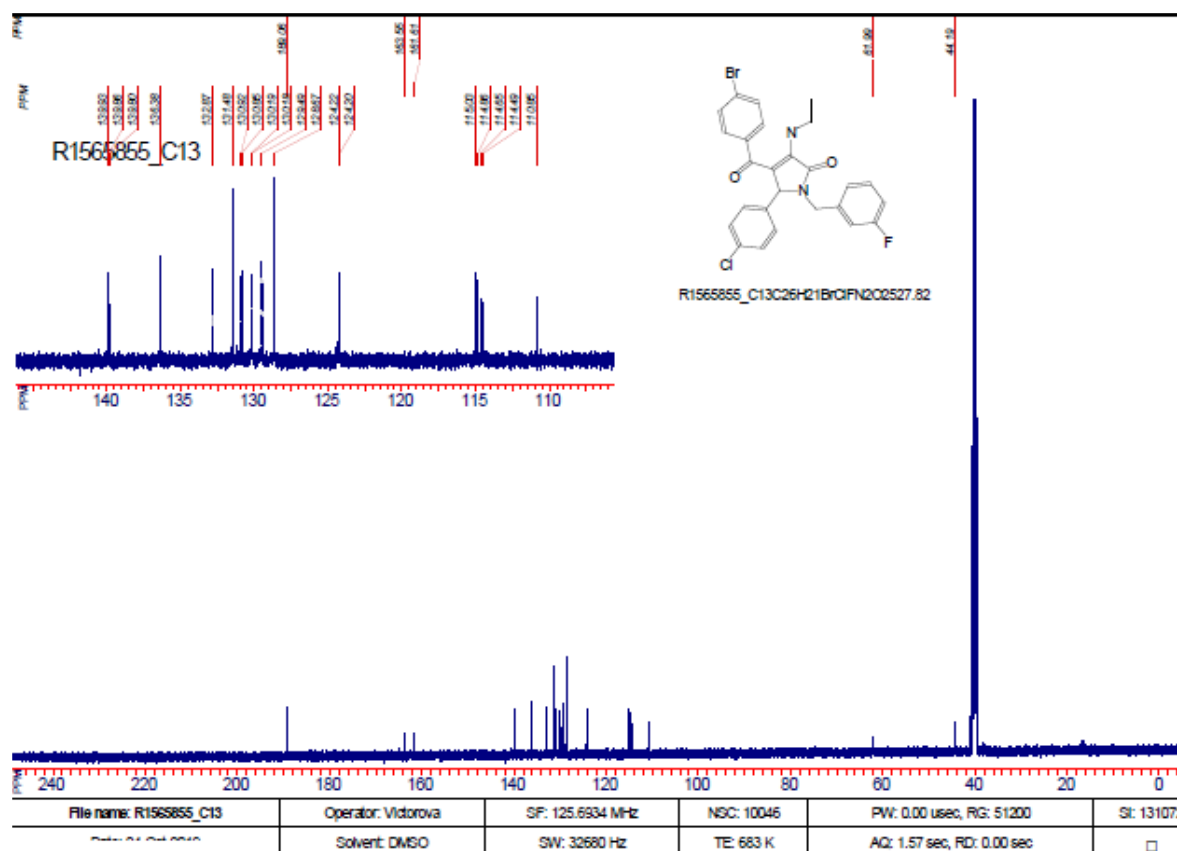

Compound 44.



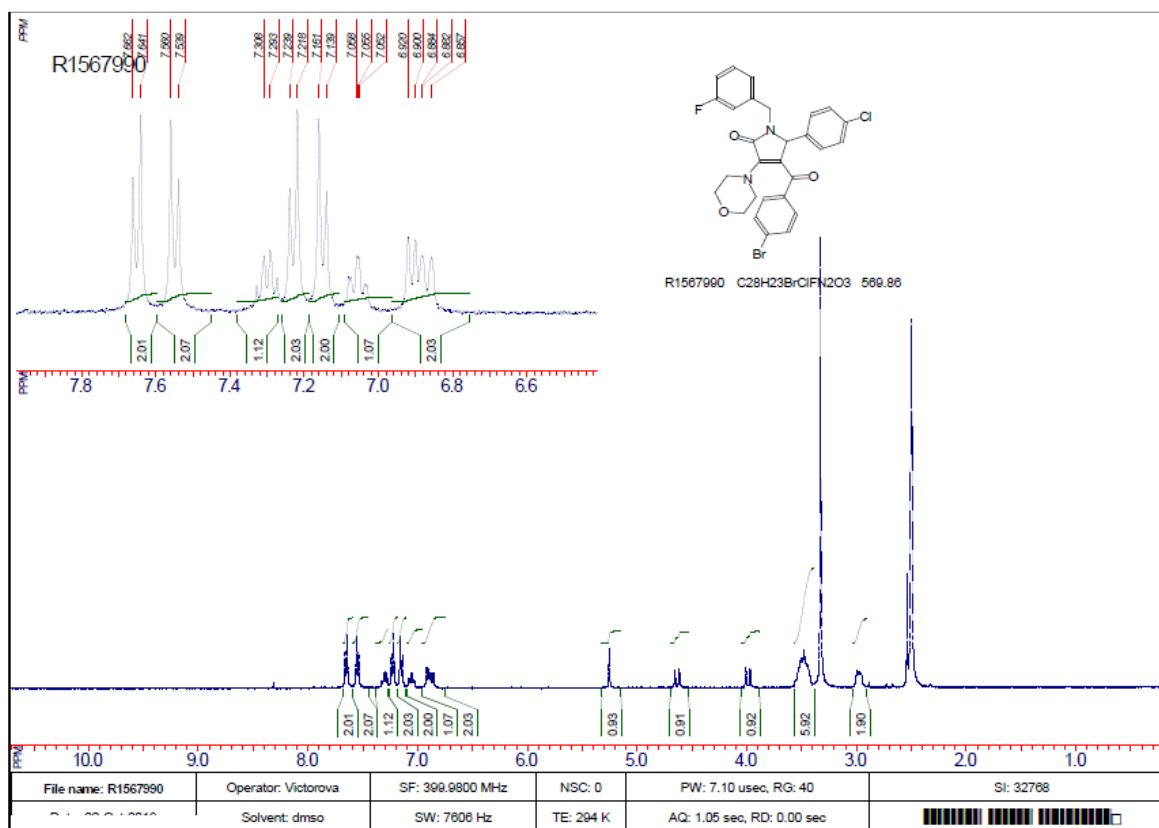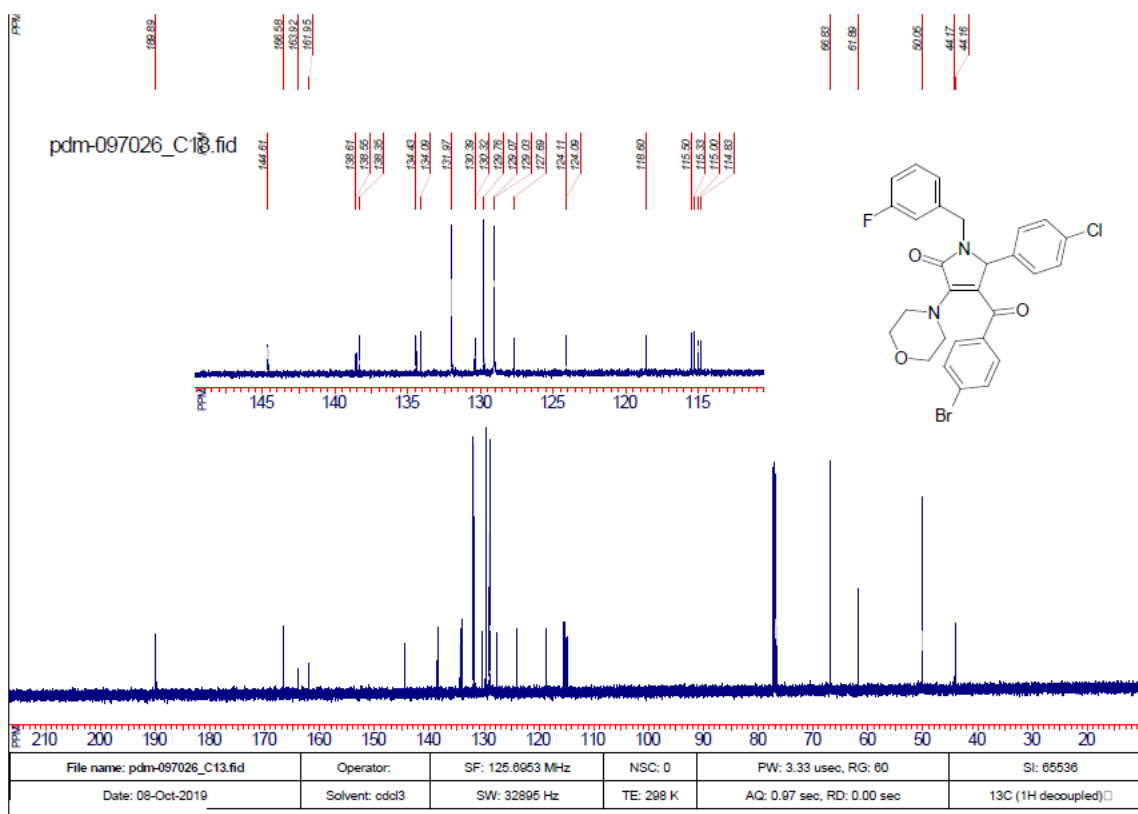

**Compound 45.**

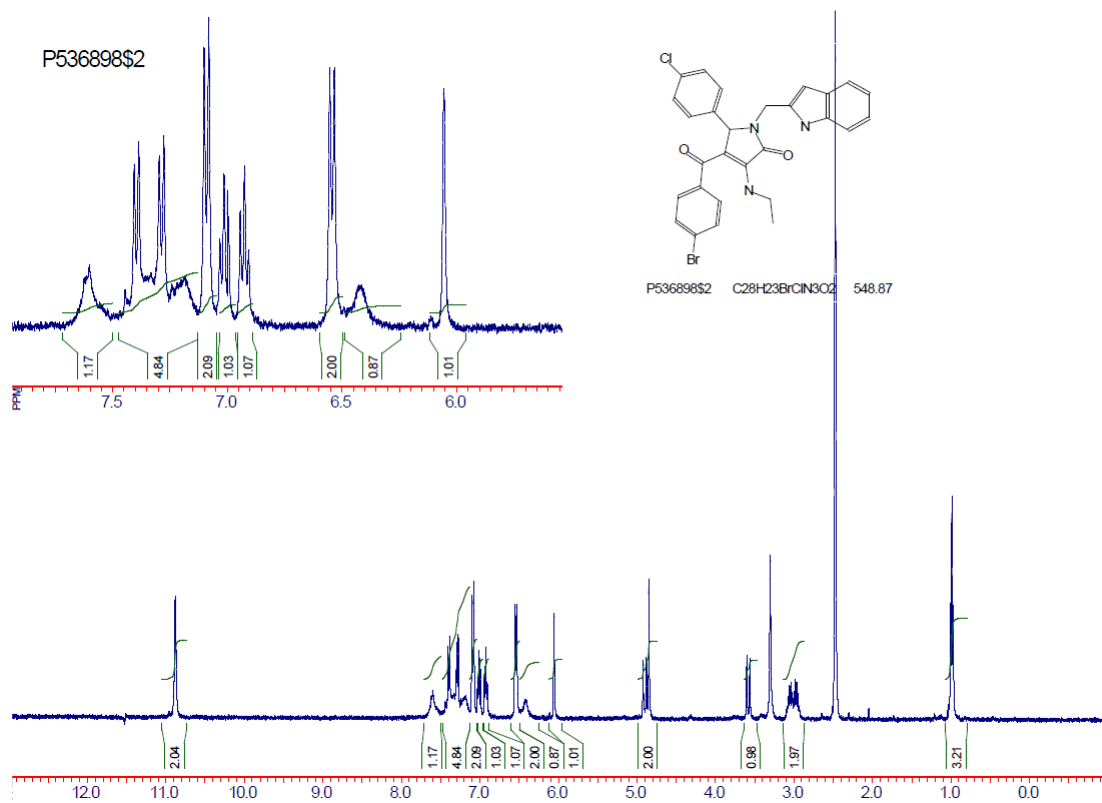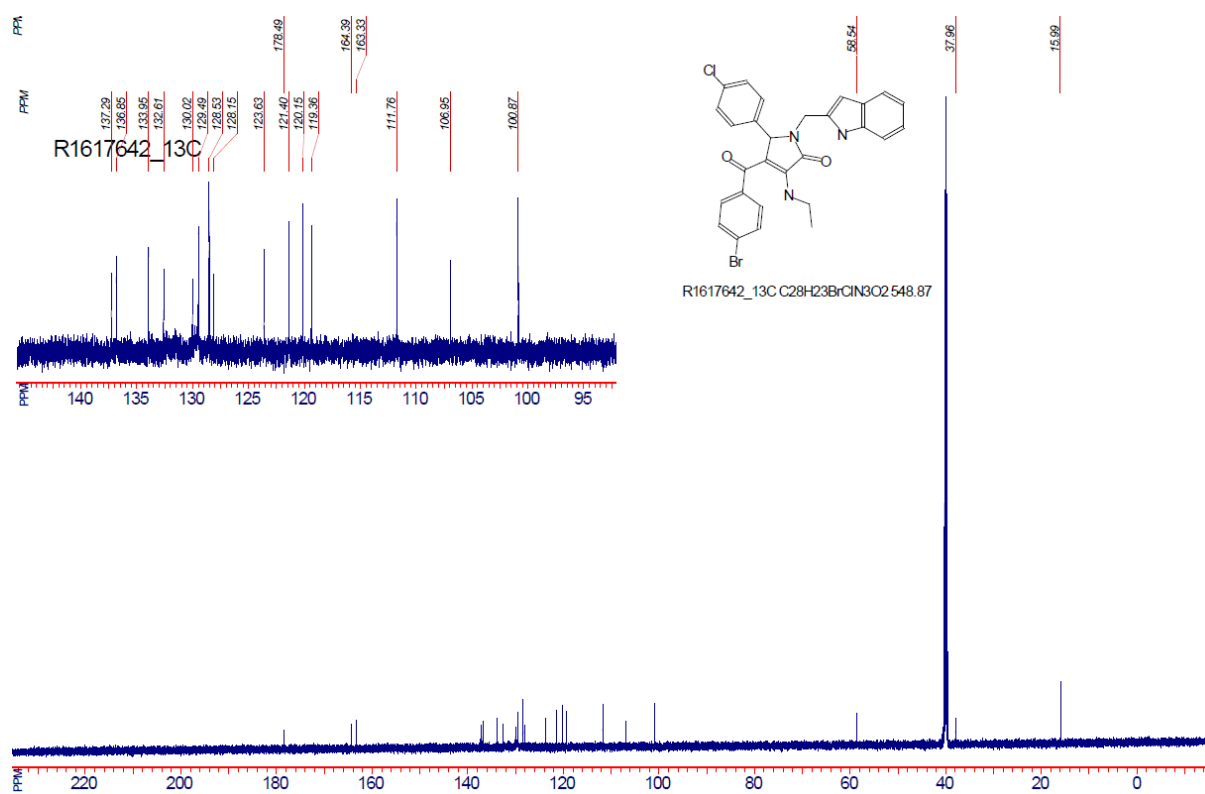

Supplement: s1 [file s1]
